# Supplementary material for: Spatial re-organization of myogenic regulatory sequences temporally controls gene expression
Source: PubMed Central journal article supplement — Nucleic Acids Res. 2015 Feb 4;43(4):2008–21. doi: 10.1093/nar/gkv046 (PMC4344497; doi:10.1093/nar/gkv046), 2015-02-04
Supplement: supp_gkv046_nar-01903-x-2014-File009.pdf [file supp_gkv046_nar-01903-x-2014-File009.pdf]

## **Supplemental Figure Legends**

**Figure S1: PCR amplification control data.** Purified BAC DNA was used as a template to examine amplification between the indicated primer and primers spanning the *Ckm* locus. Interaction frequencies were normalized to the Ct value of the corresponding ligated BAC amplicon.

**Figure S2: Interactions between *Des* and *Acta1* promoters but not between *Myog* and either *Des* or *Acta1*.** 3C experiments demonstrating inter-chromosomal interactions between the *Des* and *Acta1* promoters and the lack of detectable interactions between the *Myog* and *Acta1* or the *Myog* and *Des* promoters at the onset of C2C12 cell differentiation. The maximum interaction frequency value was normalized to 1 and all other values are shown relative to that value. Values represent the average plus/minus the standard deviation from three independent experiments.

**Figure S3: Expression profiles of myogenic genes as a function of time of C2C12 cell differentiation.** Quantitative-PCR (qPCR) was performed on RNA isolated from C2C12 cells proliferating in growth media or differentiated for the indicated times. The expression of the housekeeping gene *Eef1a1* is shown as a control. Expression levels in growth media were normalized to 1; all other values are relative to that value. The results represent the average plus/minus the standard deviation from three independent experiments.

**Figure S4: siRNA against MyoD inhibited MyoD binding to target gene promoters.** C2C12 cells transfected with a control siRNA or siRNA against MyoD were differentiated and harvested for ChIP experiments. MyoD binding to the indicated promoter sequences is shown. ChIP with IgG is shown as a control. The binding observed in control siRNA sample was normalized to 1; all other values are relative to that value. The results represent the average plus/minus the standard deviation from three independent experiments.

**Figure S5: MyoD, but not Brg1, binds to the *Acta1* promoter at the onset of differentiation.** ChIP assays assessing binding of Brg1 and MyoD to the *Acta1* promoter binds to both enhancer and promoter sequences in a Brg1 independent manner at the onset of differentiation. Data in (A-B) represent the average plus/minus the standard deviation from three independent experiments. For each data set, the value of the mock-differentiated, plus tet sample was set at 1.0. M; mock-differentiated, where cells were infected with an empty, instead of a MyoD encoding, retrovirus.

**Table S1: 3C Primer and BAC information**

**Table S2: qPCR primer list**

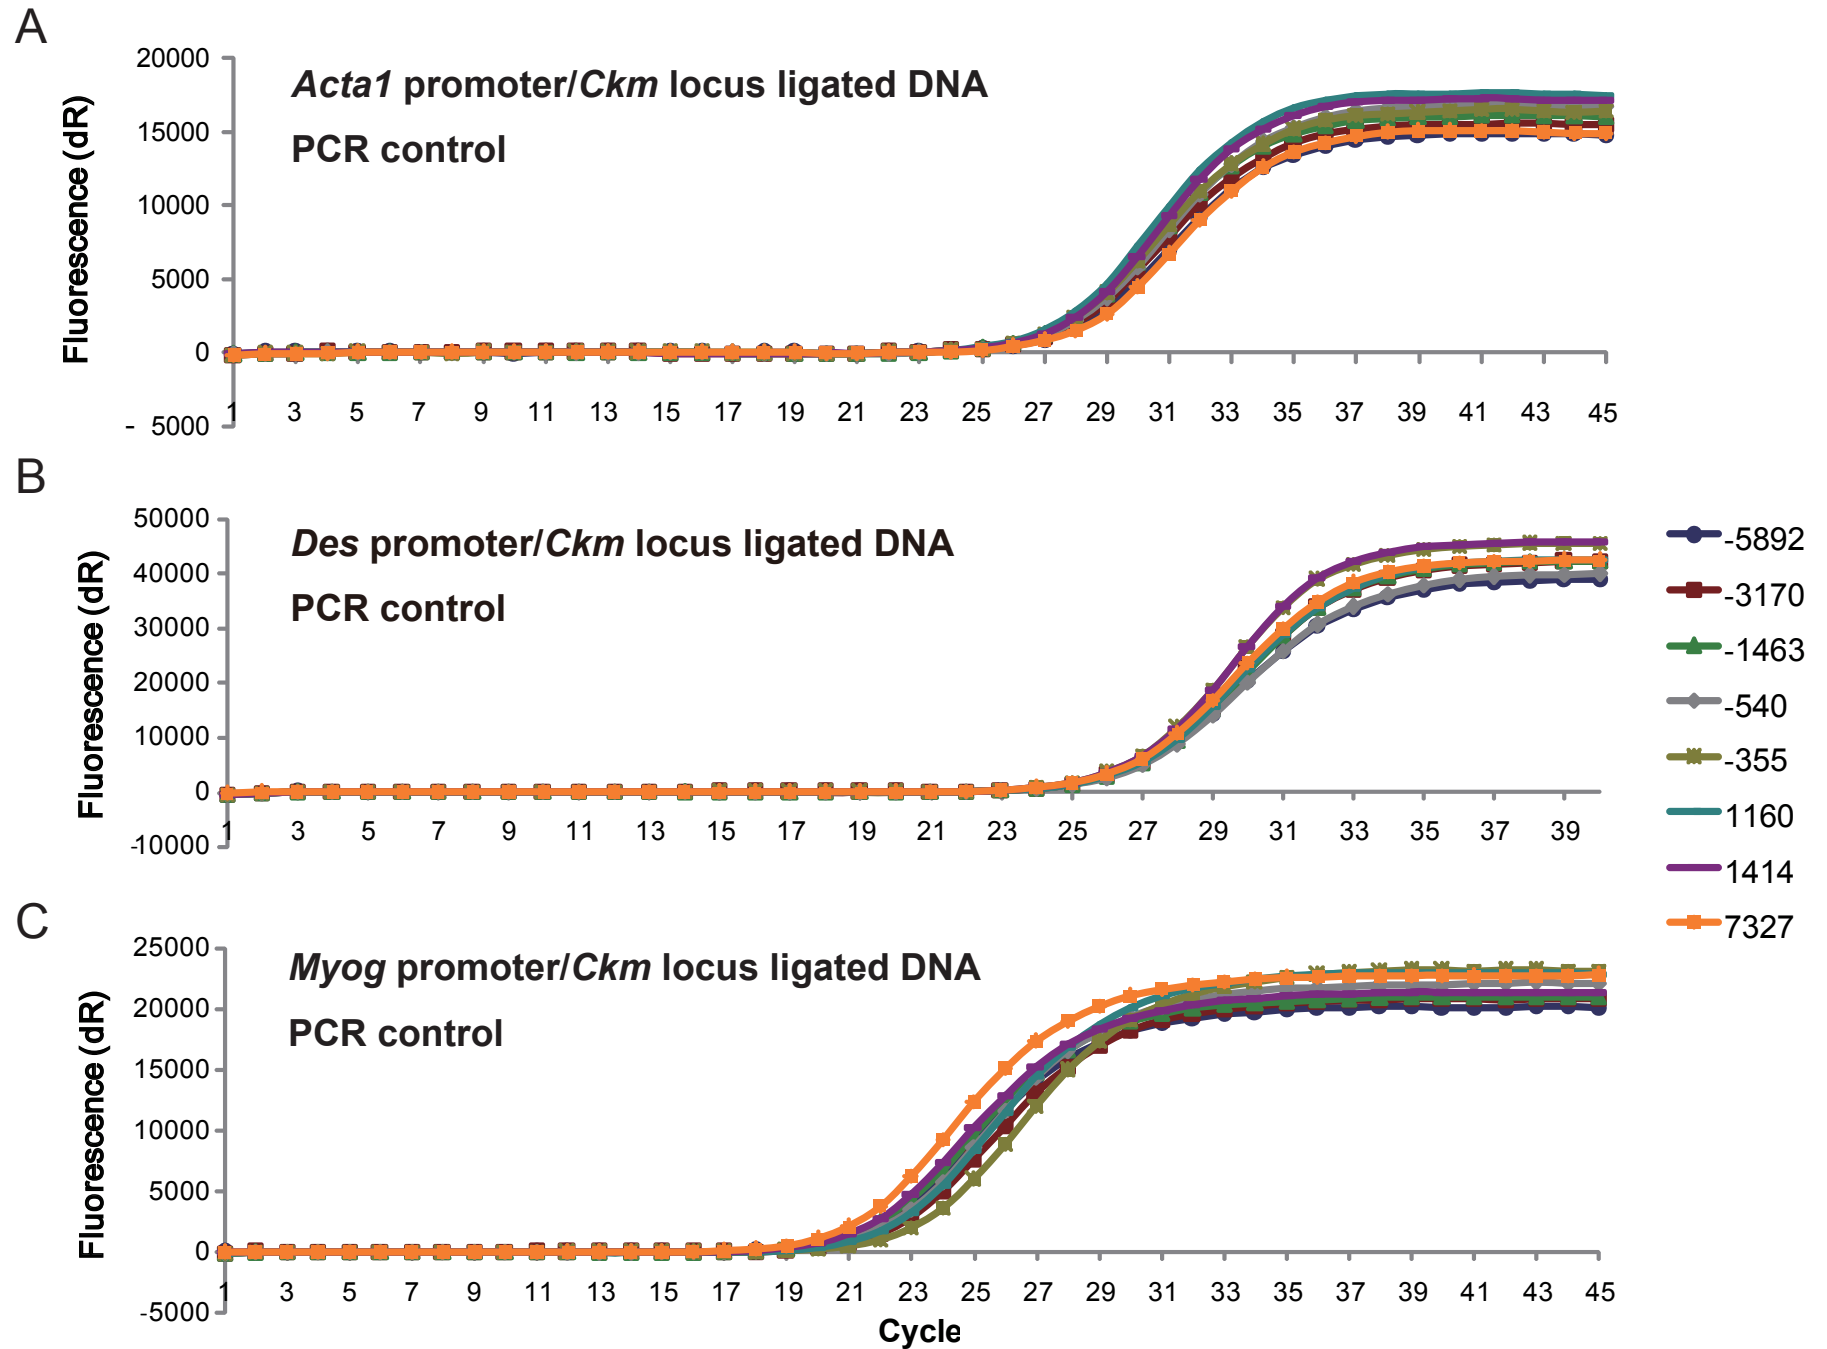

Figure S1

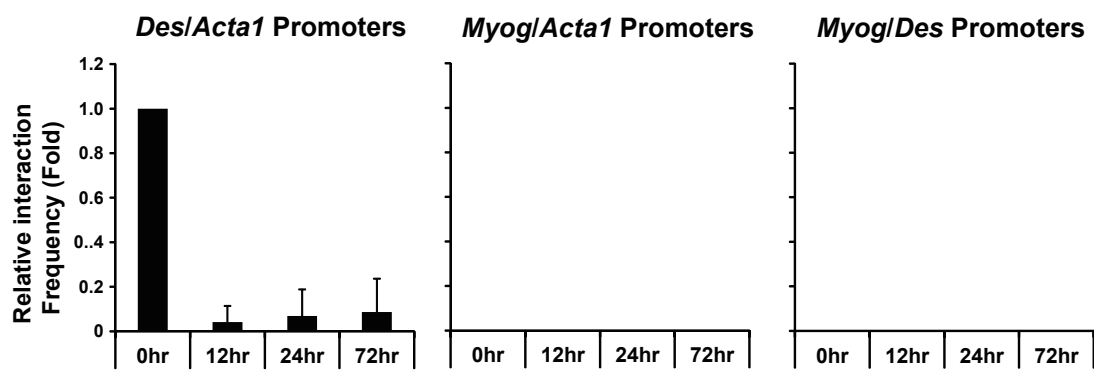

FigureS2

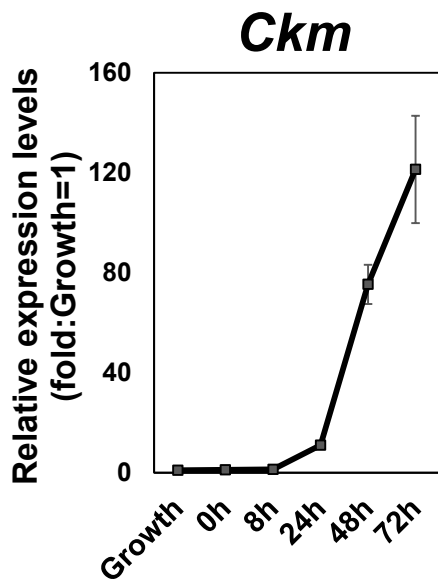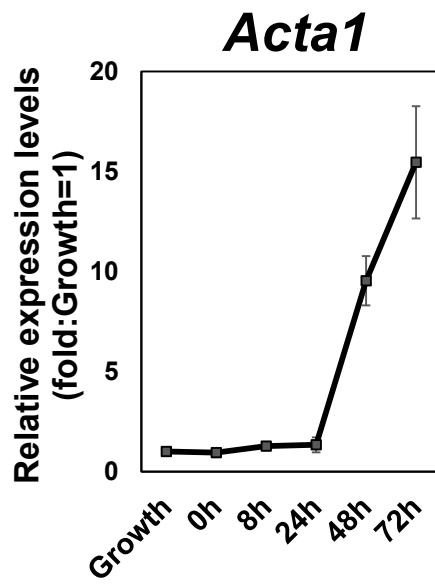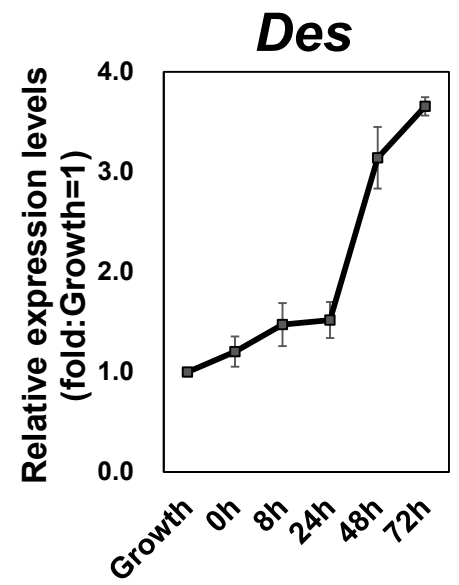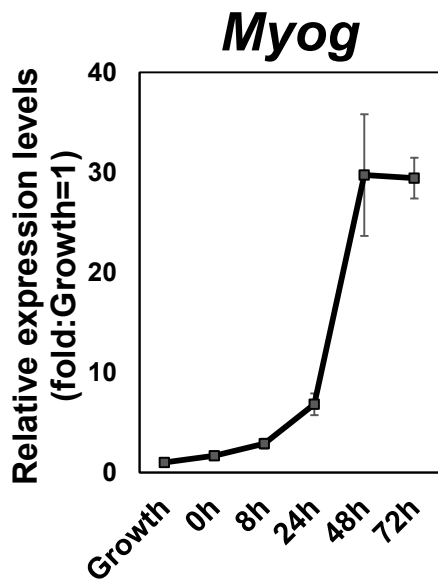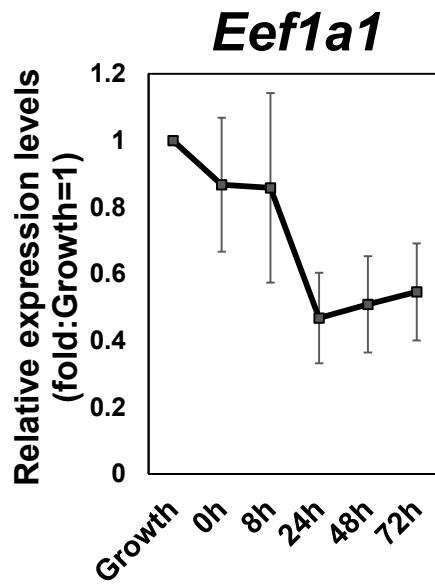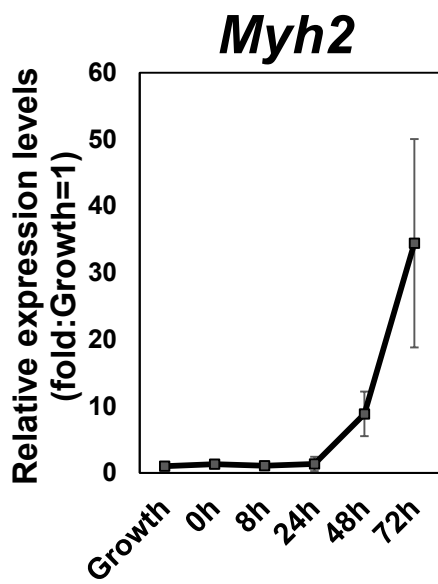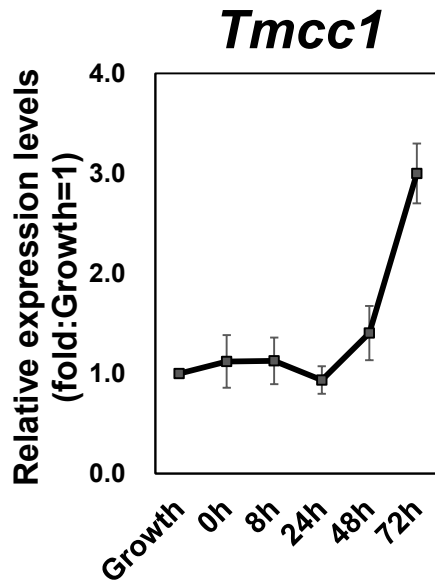

Fig. S3

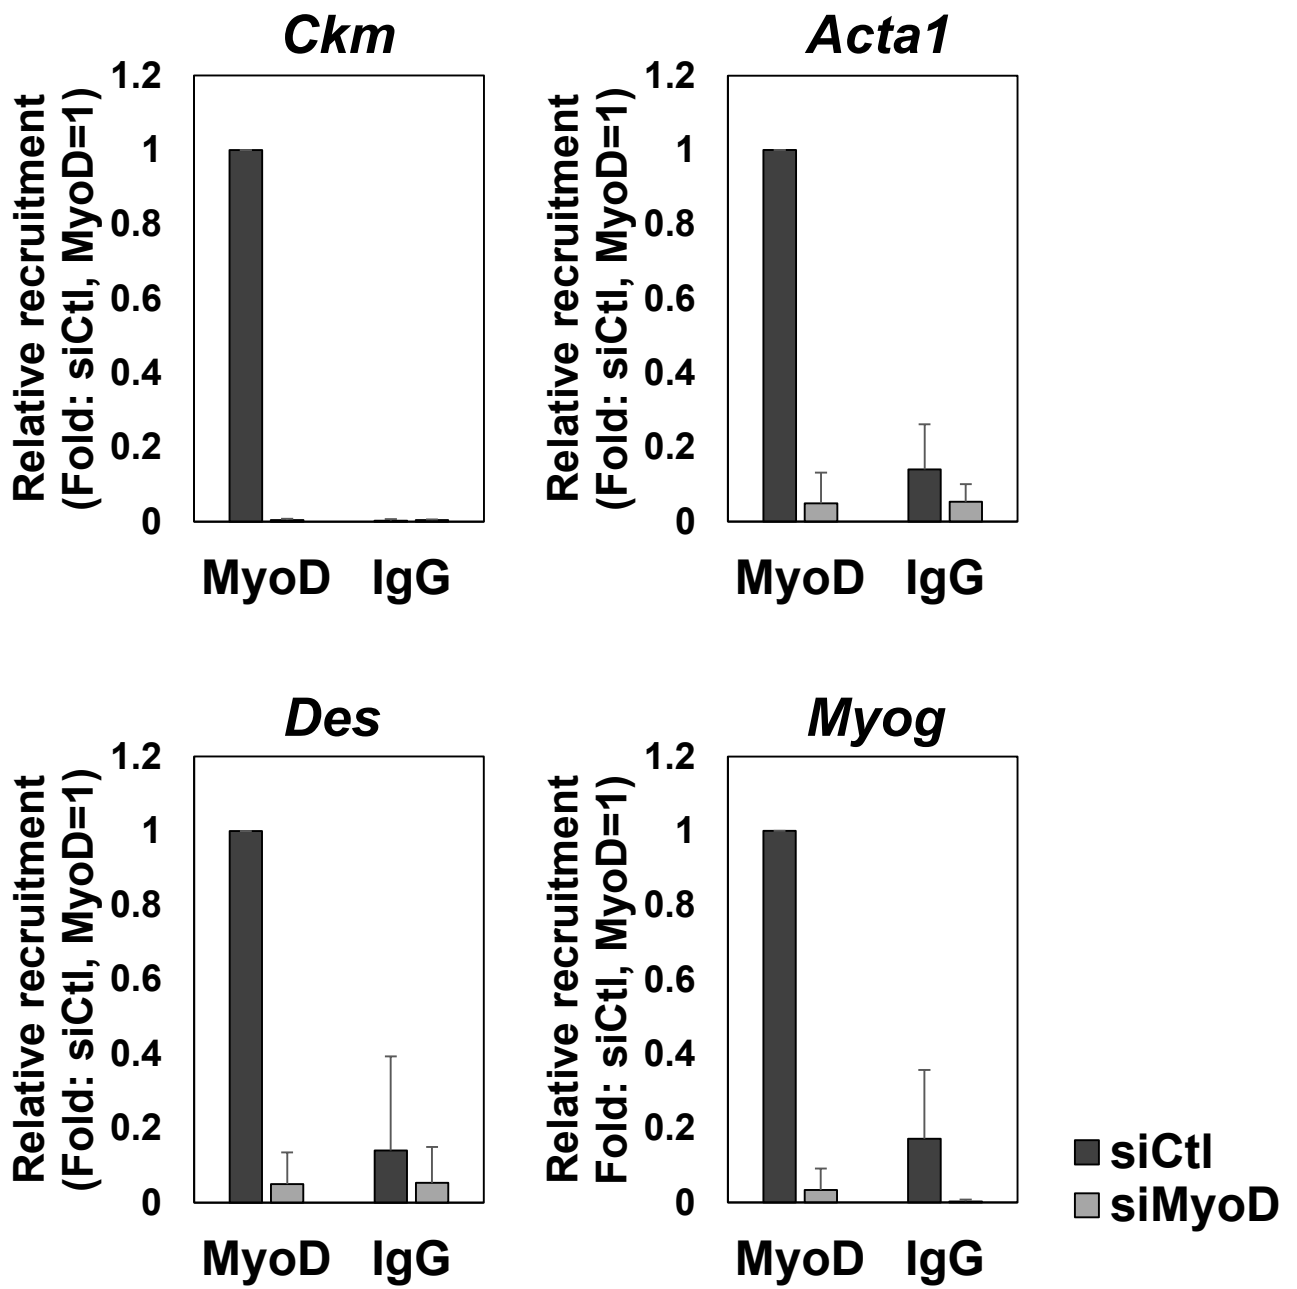

Fig. S4

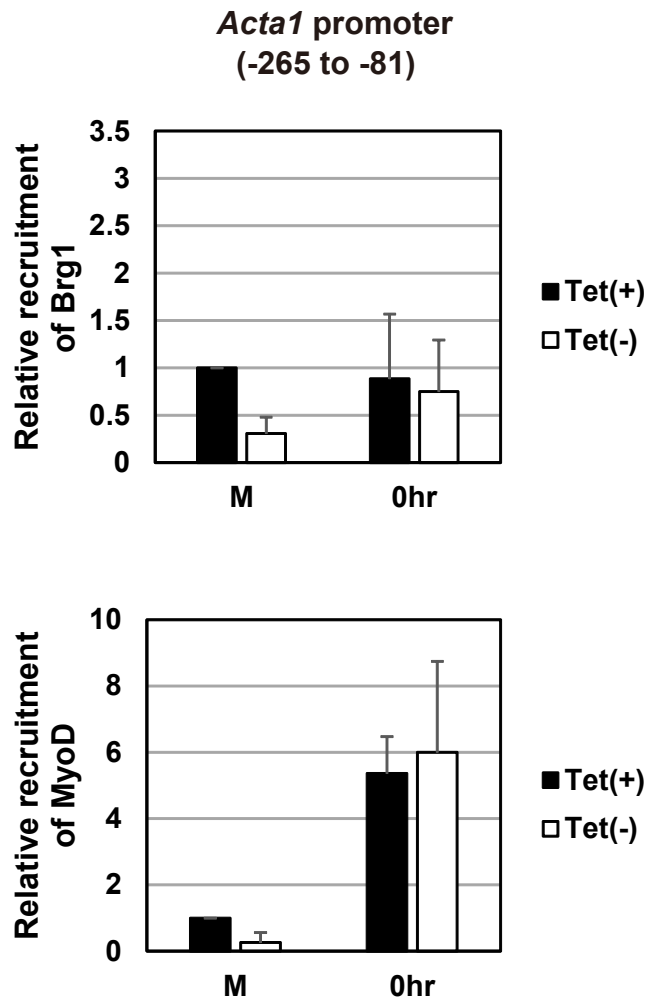

Fig. S5

## 3C primers

### myog

|       |                                |
|-------|--------------------------------|
| -4918 | TGCAATGTCACAGAGGTCTAAGCTCAAGTC |
| -4479 | TCCGCTCCGAAGCCCATGAGACTCCAGAGT |
| -465  | GGGTCTCATGGGACTGACATAGTATGGTTT |
| 3365  | CGTACTGCTTGTCTGGTTTCCTGGAGATTA |
| 5589  | TGTTCTTTACTGGCTTGCCTCCCCTGGCTT |
| 7190  | CAAAGCTAGCCCCAGAGTCCCTAGAAGGAG |
| rev   | TTTTCATTTCTCCACAGCCCTGTGGGGCA  |

### ckm

|       |                                |
|-------|--------------------------------|
| -5892 | TGCCCTCCTTTTCTGAGGCAGGGTCTCACT |
| -3170 | TCTGACCCTCAGTGGCTCCCATGAACTCCT |
| -1463 | AGGCAGAAGAGGAAACTTCCACAGTGCATC |
| -540  | CATGTCTGAGGCCAGCCTGGACTACATAGG |
| -355  | GGAGGGTGCTGGCTACAATCAAGGCTGTGG |
| 1160  | CCCCATGGTCAGTGGCTCAGGGATCTAGTC |
| 1414  | AATGTGCACACCTGTGCACATACATGAGCC |
| 7327  | CAGATGGAGAGAATCTGCCTGGCATGCATA |
| rev   | TGAGAGTAGATGAGCTTCAGCTCGTTGCC  |

### tmcc1

|        |                                 |
|--------|---------------------------------|
| -8019  | TACAGCACCTCCTTTGTCCCCACTCCTATC  |
| -3204  | AAAACAGCGCTAAAAGGAGCTCATGGGTTG  |
| -473   | CACGTATCCTCAGCCCCTTTCTCTGCTTTT  |
| 120    | CCAGTCCTACTACCGGTGGAGAGACGACG   |
| 3901   | AAGTTGAATGGCAACACAATGGCAATGCTC  |
| 8412   | GCTGTGGCCGTTTACTACTGAGTTTGTCTT  |
| 15180  | GCAGGAGGTGTGTTAACTCCTTGAGCACCA  |
| 104484 | TGAGGGTCTGATGAGCTATTGCATTGAACA  |
| rev    | CGTTCTCGTTCTAGCTGTCTGTTCCCTCGCG |

### des

|     |                                |
|-----|--------------------------------|
| rev | AGCCCCTTAGCTGTCTGCACTATTTGTAGC |
|-----|--------------------------------|

### acta1

|     |                                |
|-----|--------------------------------|
| rev | CTGTGACCAAACAGGCGACATGCTTTGAGG |
|-----|--------------------------------|

### myh2

|     |                                |
|-----|--------------------------------|
| rev | TATATGGCTAGCTATGGAAACAATGCGACT |
|-----|--------------------------------|

### eef1a1

|     |                                |
|-----|--------------------------------|
| rev | CGGCCAGAATCTATCCCTACTCTTCCTTAC |
|-----|--------------------------------|

## BAC clones

|        |             |
|--------|-------------|
| Desmin | RP24-335G4  |
| MCK    | RP23-457C1  |
| Tmcc1  | RP24-188A4  |
| Myh2   | RP24-230G5  |
| Acta 1 | RP24-271N5  |
| Myog   | RP24-343C14 |

Table S1



**Table S2. Quantitative RT-PCR primer list**

Acta1:

5'-TTGTGCACCGCAAATGCTTCTAGG-3'

5'-ATGTACACGTCAAAAACAGGCGCC-3'

Ckm:

5'-AAGTCCAATCATTGGGCTCTGTCC-3'

5'-ACGGACTTTTATTTAAGGCAGGGC-3'

Eef1a1:

5'-CTCTGACTACCCTCCACTTGGTCG-3'

5'-ATTAAGACTGGGGTGGCAGGTGTT-3'

Des:

5'-TTTCTCCACTCACAGGCTCTGACC-3'

5'-GAGCTGGGTTCTCTCTTAAGAGCC-3'

Myog:

5'-AAAGCCATCACTTCTGTAGCAGGG-3'

5'-TCTCTGGACTCCATCTTTCTCTCC-3'

Myh2:

5'-AAGTGACTGTGAAAACAGAAGCA-3'

5'-GCAGCCATTTGTAAGGGTTGAC-3'

Tmcc1:

5'-GATCTTAAGCTGCTAATTGTCGAG-3'

5'-CAGGTTTCTAGCTGAGGTCTTTAT3'
